# Supplementary material for: A Dynamic Fitting Strategy for Physiological Models: A Case Study of a Cardiorespiratory Model for the Simulation of Incremental Aerobic Exercise
Source: MDPI journal article supplement (doi:10.3390/jpm14040406), 2024-04-11
Supplement: s1 [file s1]

## **TITLE**

Supplementary Material for “A dynamic fitting strategy for physiological models: A case study of a cardiorespiratory model for the simulation of incremental aerobic exercise”.

## **AUTHORS**

### ***Names***

Carlos A. Sarmiento\*, Alher M. Hernández, Miguel Á. Mañanas, Leidy Y. Serna

### ***Correspondence Information***

- Corresponding author: Carlos Andrés Sarmiento
- Address: Bioinstrumentation and Clinical Engineering Research Group, Bioengineering Department, Engineering Faculty, Universidad de Antioquia UdeA, Calle 70 # 52-51, Medellin 050016, Colombia.
- E-mail address: carlos.sarmiento@dea.edu.co

## MODEL EQUATIONS

The equations of the cardiorespiratory model used as a case study and related with the manuscript are presented bellow. Full details of each of the systems and controllers' equations, and the nominal values of the parameters can be consulted in the previous work [1].

### S1. Cardiovascular System

The equations at different circulatory system points are presented below. The main elements include compliances (C), inertances (L), pressures (P), blood flows (Q), hydraulic resistances (R) and blood volumes (V). Multiple subscripts are used to indicate a specific compartment: sa, systemic arteries; vc, vena cava; pa, pulmonary arteries; pp, pulmonary peripheral circulation; pv, pulmonary veins; la, left atrium; lv, left ventricle; ra, right atrium; rv, right ventricle. The systemic circulation describes peripheral and venous circulation (subscripts p and v) in six compartments: extra-splanchnic (e), splanchnic (s), brain (b), coronary (c), skeletal resting muscle (rm) and active skeletal muscle (am).  $P_{abd}$ ,  $P_{im}$  and  $P_{thor}$  are the abdominal pressure, the extravascular pressure of the active muscle veins (i.e., the intramuscular pressure) and the intrathoracic pressure, respectively. The subscripts i, n, max, min, T, and u are used to indicate input, nominal, maximum, minimum, total, and unstressed values, respectively.

#### S1.1. Systemic Circulation

$$L_{sa} \cdot \frac{dQ_{sa}}{dt} = (P_{sa} - P_{thor}) - R_{sa} \cdot Q_{sa} - P_{sp} \quad (S1)$$

**Table S1. Parameters of Systemic Circulation.**

| Parameter | Definition                             |
|-----------|----------------------------------------|
| $R_{sa}$  | Systemic arterial hydraulic resistance |
| $L_{sa}$  | Systemic arterial inertance            |

#### S1.2. Pulmonary Circulation

$$L_{pa} \cdot \frac{dQ_{pa}}{dt} = P_{pa} - R_{pa} \cdot Q_{pa} - P_{pp} \quad (S2)$$

**Table S2. Parameters of Pulmonary Circulation.**

| Parameter | Definition                         |
|-----------|------------------------------------|
| $L_{pa}$  | Pulmonary arterial inertance       |
| $R_{pa}$  | Pulmonary arterial flow resistance |

#### S1.3. The Heart

$$R_{lv} = KR_{lv} \cdot P_{max,lv} \quad (S3)$$

$$P_{max,lv}(t) = \varphi(t) \cdot E_{max,lv} \cdot (V_{lv} - V_{u,lv}) + [1 - \varphi(t)] \cdot P_{0,lv} \cdot (\exp^{(K_{E,lv} \cdot V_{lv})} - 1) \quad 0 \leq \varphi(t) \leq 1 \quad (S4)$$

$$R_{rv} = KR_{rv} \cdot P_{max,rv} \quad (S5)$$

$$P_{max,rv}(t) = \varphi(t) \cdot E_{max,rv} \cdot (V_{rv} - V_{u,rv}) + [1 - \varphi(t)] \cdot P_{0,rv} \cdot (\exp^{(K_{E,rv} \cdot V_{rv})} - 1) \quad 0 \leq \varphi(t) \leq 1 \quad (S6)$$

Where  $W_{h,lv}$  and  $W_{h,rv}$  are the average power of the cardiac pump for the left and right ventricles;  $E_{max,lv}$  and  $E_{max,rv}$  are the left and right ventricular elastance at the instant of maximum contraction;  $\varphi(t)$  is the ventricle activation function, with  $\varphi(t) = 1$  at maximum contraction and  $\varphi(t) = 0$  at complete relaxation.

**Table S3. Parameters of the Heart.**

| Parameter  | Definition                                                                                     |
|------------|------------------------------------------------------------------------------------------------|
| $K_{E,lv}$ | Parameters that describe the end-diastolic pressure-volume relationship in the left ventricle  |
| $K_{E,rv}$ | Parameters that describe the end-diastolic pressure-volume relationship in the Right ventricle |
| $KR_{lv}$  | Parameters that mimic the viscosity of the left ventricle                                      |
| $KR_{rv}$  | Parameters that mimic the viscosity of the right ventricle                                     |
| $P_{0,lv}$ | Parameters that describe the end-diastolic pressure-volume relationship in the left ventricle  |
| $P_{0,rv}$ | Parameters that describe the end-diastolic pressure-volume relationship in the right ventricle |
| $V_{u,lv}$ | Left ventricular unstressed volume                                                             |
| $V_{u,rv}$ | Right ventricular unstressed volume                                                            |

## S2. Cardiovascular Controller

The equations describing the mechanisms of cardiovascular controller are presented below.

### S2.1. Afferent Pathways

#### Afferent Baroreflex Pathway

$$\tau_p \cdot \frac{d\tilde{P}}{dt} = P_{sa} + \tau_z \cdot \frac{dP_{sa}}{dt} - \tilde{P} \quad (S7)$$

$$f_{ab} = \frac{f_{ab,min} + f_{ab,max} \cdot \exp\left(\frac{\bar{P}-P_n}{k_{ab}}\right)}{1 + \exp\left(\frac{\bar{P}-P_n}{k_{ab}}\right)} \quad (S8)$$

Where  $f_{ab}$  is the afferent activity from baroreceptors.

**Table S4. Parameters of Afferent Pathways: Afferent Baroreflex Pathway.**

| Parameter    | Definition                                                                            |
|--------------|---------------------------------------------------------------------------------------|
| $f_{ab,max}$ | Upper saturation level of the frequency discharge in the baroreceptor afferent fibers |
| $f_{ab,min}$ | Lower saturation level of the frequency discharge in the baroreceptor afferent fibers |
| $k_{ab}$     | Parameter related to the slope of the static function at the central point            |
| $P_n$        | Value of baroreceptor pressure at the central point of the sigmoidal function         |
| $\tau_p$     | Time constant for the real pole                                                       |
| $\tau_z$     | Time constant for the real zero                                                       |

#### Afferent Chemoreflex Pathway

$$\varphi_{ac} = \frac{f_{ac,max} + f_{ac,min} \cdot \exp\left(\frac{PaO_2 - PaO_{2ac,n}}{k_{ac}}\right)}{1 + \exp\left(\frac{PaO_2 - PaO_{2ac,n}}{k_{ac}}\right)} \cdot \left[ K \cdot \ln\left(\frac{PaCO_2}{PaCO_{2,n}}\right) + f_{acCO_{2,n}} \right] \quad (S9)$$

$$K = \begin{cases} K_H & PaO_2 > 80 \\ K_H - 1.2 \cdot \left(\frac{PaO_2 - 80}{30}\right) & 40 < PaO_2 < 80 \\ K_H - 1.6 & PaO_2 < 40 \end{cases} \quad (S10)$$

$$\tau_{ac} \cdot \frac{df_{ac}}{dt} = \varphi_{ac} - f_{ac} \quad (S11)$$

Where  $f_{ac}$  is the afferent activity from chemoreceptors.

**Table S5. Parameters of Afferent Pathways: Afferent Chemoreflex Pathway.**

| Parameter        | Definition                                                                             |
|------------------|----------------------------------------------------------------------------------------|
| $f_{acCO_{2,n}}$ | Constant parameter tuned to reproduce the CO <sub>2</sub> static response              |
| $f_{ac,max}$     | Upper saturation level of the frequency discharge in the chemoreceptor afferent fibers |
| $f_{ac,min}$     | Lower saturation level of the frequency discharge in the chemoreceptor afferent fibers |
| $k_{ac}$         | Parameter related to the slope of the sigmoid at the central point                     |
| $K_H$            | Constant parameter tuned to reproduce the CO <sub>2</sub> static response              |
| $PaO_{2ac,n}$    | Arterial PO <sub>2</sub> at the central point of the sigmoid                           |
| $PaCO_{2,n}$     | PaCO <sub>2</sub> basal value                                                          |
| $\tau_{ac}$      | Time constant of the chemoreceptor mechanism                                           |

## S2.2. Blood Flow Local Control

### Cerebral Blood Flow

$$\Phi_b = \frac{A + \frac{B}{1 + C \cdot \exp(D \cdot \log(PaCO_2))}}{A + \frac{B}{1 + C \cdot \exp(D \cdot \log(PaCO_{2,n}))}} - 1 \quad (S12)$$

$$\tau_{CO_2} \cdot \frac{dx_{b,CO_2}}{dt} = -x_{b,CO_2} - \Phi_b \quad (S13)$$

Where  $PaCO_2$  is the arterial carbon dioxide partial pressure and  $x_{b,CO_2}$  is a state variable representing the effect of CO<sub>2</sub> on cerebral circulation.

**Table S6. Parameters of Blood Flow Local Control: Cerebral Blood Flow.**

| Parameter     | Definition                                                              |
|---------------|-------------------------------------------------------------------------|
| $A$           | Constant parameter                                                      |
| $B$           | Constant parameter                                                      |
| $C$           | Constant parameter                                                      |
| $D$           | Constant parameter                                                      |
| $\tau_{CO_2}$ | Time constants of the effect of CO <sub>2</sub> on cerebral circulation |

### Coronary and Resting Muscle Blood Flow

$$R_{jp} = R_{jpn} \cdot \frac{(1 + x_{j,CO_2})}{(1 + x_{j,O_2})} \quad (S14)$$

$$\tau_{O_2} \cdot \frac{dx_{j,O_2}}{dt} = -x_{j,O_2} - g_{j,O_2} \cdot (C_{vj,O_2} - C_{vj,O_2n}) \quad (S15)$$

$$C_{vj,O_2} = C_{aO_2} - \frac{M_{O_2,jp}}{Q_{jp}} \quad (S16)$$

$$\Phi_j = \frac{1 - \exp\left(\frac{(PaCO_2 - PaCO_{2n})}{K_{j,CO_2}}\right)}{1 + \exp\left(\frac{(PaCO_2 - PaCO_{2n})}{K_{j,CO_2}}\right)} \quad (S17)$$

$$\tau_{CO_2} \cdot \frac{dx_{j,CO_2}}{dt} = -x_{j,CO_2} + \Phi_j \quad (S18)$$

Where the subscript j indicates the systemic compartment, h for coronary and rm for skeletal resting muscle;  $x_{j,O_2}$  and  $x_{j,CO_2}$  are state variables representing the effect of  $O_2$  and  $CO_2$  on coronary and resting muscular circulation.

**Table S7. Parameters of Blood Flow Local Control: Coronary and Resting Muscle Blood Flow.**

| Parameter      | Definition                                                                                      |
|----------------|-------------------------------------------------------------------------------------------------|
| $C_{vh,O_2n}$  | $O_2$ concentration in venous blood leaving the heart under normal conditions                   |
| $C_{vrm,O_2n}$ | $O_2$ concentration in venous blood leaving the skeletal resting muscle under normal conditions |
| $g_{h,O_2}$    | Constant gain factor                                                                            |
| $g_{rm,O_2}$   | Constant gain factor                                                                            |
| $K_{h,CO_2}$   | Parameter related to the slope of the sigmoidal function at the central point                   |
| $K_{rm,CO_2}$  | Parameter related to the slope of the sigmoidal function at the central point                   |
| $M_{O_2,hpn}$  | Nominal value of $O_2$ consumption rate in the heart                                            |
| $M_{O_2,rm}$   | Consumption rate in the resting muscle                                                          |
| $R_{hpn}$      | Normal peripheral resistance in coronary compartment                                            |

#### Active Muscle Blood Flow

$$\Phi_{met}(t) = \frac{\Phi_{min} + \Phi_{max} \cdot \exp\left(\frac{(1-I_{0,met})}{k_{met}}\right)}{1 + \exp\left(\frac{(1-I_{0,met})}{k_{met}}\right)} \quad (S19)$$

Where I is the action of central command and  $\Phi_{met}$  is the output of the static sigmoidal characteristic.

**Table S8. Parameters of Blood Flow Local Control: Active Muscle Blood Flow.**

| Parameter    | Definition                                                         |
|--------------|--------------------------------------------------------------------|
| $I_{0,met}$  | Is I at the central point of the sigmoid                           |
| $k_{met}$    | Parameter related to the slope of the sigmoid at the central point |
| $\Phi_{max}$ | Upper saturation of the static sigmoidal characteristic            |
| $\Phi_{min}$ | Lower saturation of the static sigmoidal characteristic            |

### S2.3. CNS Ischemic Response

$$w_{sj} = \frac{x_{sj}}{1 + \exp\left(\frac{(PaO_2 - \bar{P}O_{2,sj})}{k_{isc,sj}}\right)} \quad (S20)$$

$$\tau_{isc} \cdot \frac{d\Delta\theta_{O_2,sj}}{dt} = -\Delta\theta_{O_2,sj} + w_{sj} \quad (S21)$$

$$\tau_{cc} \cdot \frac{d\Delta\theta_{CO_2,sj}}{dt} = -\Delta\theta_{CO_2,sj} + g_{ccsj} \cdot (PaCO_2 - PaCO_{2n}) \quad (S22)$$

$$\theta_{sj} = \theta_{sjn} - \Delta\theta_{O_2,sj} - \Delta\theta_{CO_2,sj} \quad (S23)$$

Where the subscript j=p, v, h indicates the response for peripheral resistances, veins, and heart, respectively;  $x_{sj}$  is the saturation of the hypoxic response;  $\Delta\theta_{O_2,sj}$  represents the change in the offset term caused by the CNS hypoxia;  $\Delta\theta_{CO_2,sj}$  represents the change in the offset term caused by central chemoreceptor stimulation.

**Table S9. Parameters of CNS Ischemic Response.**

| Parameter         | Definition                                                                                                |
|-------------------|-----------------------------------------------------------------------------------------------------------|
| $g_{ccsh}$        | Constant gain factor tuned to reproduce experimental results                                              |
| $g_{ccsp}$        | Constant gain factor tuned to reproduce experimental results                                              |
| $g_{ccsv}$        | Constant gain factor tuned to reproduce experimental results                                              |
| $k_{isc,sh}$      | Parameter related to the slope of the static function at the central point for heart                      |
| $k_{isc,sp}$      | Parameter related to the slope of the static function at the central point for peripheral resistance      |
| $k_{isc,sv}$      | Parameter related to the slope of the static function at the central point for unstressed volume of veins |
| $\bar{P}O_{2,sh}$ | Value of $PO_2$ at the central point of the sigmoidal function for heart                                  |
| $\bar{P}O_{2,sp}$ | Value of $PO_2$ at the central point of the sigmoidal function for peripheral resistance                  |
| $\bar{P}O_{2,sv}$ | Value of $PO_2$ at the central point of the sigmoidal function for unstressed volume of veins             |

| Parameter      | Definition                                                        |
|----------------|-------------------------------------------------------------------|
| $\tau_{cc}$    | Time constant                                                     |
| $\tau_{isc}$   | Time constant of the mechanism                                    |
| $\theta_{shn}$ | Offset term in basal condition for heart                          |
| $\theta_{spn}$ | Offset term in basal condition for peripheral resistance          |
| $\theta_{svn}$ | Offset term in basal condition for unstressed volume of veins     |
| $x_{sh}$       | Saturation of the hypoxic response for heart                      |
| $x_{sp}$       | Saturation of the hypoxic response for peripheral resistance      |
| $x_{sv}$       | Saturation of the hypoxic response for unstressed volume of veins |

## S2.4. Efferent Pathways

$$f_{sj} = \begin{cases} f_{es,\infty} + (f_{es,0} - f_{es,\infty}) \cdot \exp(k_{es} \cdot f_{asj}) + \gamma_{sj}(I) & f_{sj} < f_{es,max} \\ f_{es,max} & f_{sj} \geq f_{es,max} \end{cases} \quad (S24)$$

$$f_{asj} = W_{t,sj} \cdot Nt + W_{b,sj} \cdot f_{ab} + W_{c,sj} \cdot f_{ac} + W_{p,sj} \cdot f_{ap} - \theta_{sj} \quad (S25)$$

$$f_v = \frac{f_{ev,0} + f_{ev,\infty} \cdot \exp\left(\frac{f_{ab} - f_{ab,0}}{k_{ev}}\right)}{1 + \exp\left(\frac{f_{ab} - f_{ab,0}}{k_{ev}}\right)} - W_{t,v} \cdot Nt + W_{c,v} \cdot f_{ac} + W_{p,v} \cdot f_{ap} - \theta_v + \gamma_v(I) \quad (S26)$$

$$\gamma_i = \frac{\gamma_{i,min} + \gamma_{i,max} \cdot \exp\left(\frac{1 - I_{0,i}}{k_{cc,i}}\right)}{1 + \exp\left(\frac{1 - I_{0,i}}{k_{cc,i}}\right)} \quad (S27)$$

Where the subscript j=h, p, v indicates sympathetic activity to heart, peripheral resistances, and veins, respectively; the subscript i=sp, sv and sh indicate sympathetic activity to peripheral arteries, veins and heart, and v denotes vagal activity;  $f_{sj}$  is the sympathetic activity;  $f_v$  is the frequency of spike in the efferent vagal fibers.

**Table S10. Parameters of Efferent Pathways.**

| Parameter         | Definition                                                      |
|-------------------|-----------------------------------------------------------------|
| $f_{ab,0}$        | Central value in the curve of $f_{ab}$                          |
| $f_{es,0}$        | Constant parameter                                              |
| $f_{es,\infty}$   | Constant parameter                                              |
| $f_{es,max}$      | Upper saturation level above for the sympathetic activity       |
| $f_{ev,0}$        | Constant parameter                                              |
| $f_{ev,\infty}$   | Constant parameter                                              |
| $k_{es}$          | Constant parameter                                              |
| $k_{ev}$          | Constant parameter                                              |
| $I_{0,sh}$        | Value of exercise intensity at the central point of the sigmoid |
| $I_{0,sp}$        | Value of exercise intensity at the central point of the sigmoid |
| $I_{0,sv}$        | Value of exercise intensity at the central point of the sigmoid |
| $I_{0,v}$         | Value of exercise intensity at the central point of the sigmoid |
| $k_{cc,sh}$       | Parameter related to the slope at the central point             |
| $k_{cc,sp}$       | Parameter related to the slope at the central point             |
| $k_{cc,sv}$       | Parameter related to the slope at the central point             |
| $k_{cc,v}$        | Parameter related to the slope at the central point             |
| $\gamma_{sh,max}$ | Upper saturation of the central command response                |
| $\gamma_{sh,min}$ | Lower saturation of the central command response                |
| $\gamma_{sp,max}$ | Upper saturation of the central command response                |
| $\gamma_{sp,min}$ | Lower saturation of the central command response                |
| $\gamma_{sv,max}$ | Upper saturation of the central command response                |
| $\gamma_{sv,min}$ | Lower saturation of the central command response                |
| $\gamma_{v,max}$  | Upper saturation of the central command response                |
| $\gamma_{v,min}$  | Lower saturation of the central command response                |
| $\theta_v$        | Offset term                                                     |
| $W_{b,sh}$        | Synaptic weight tuned to reproduce physiological results        |
| $W_{b,sp}$        | Synaptic weight tuned to reproduce physiological results        |
| $W_{b,sv}$        | Synaptic weight tuned to reproduce physiological results        |
| $W_{c,sh}$        | Synaptic weight tuned to reproduce physiological results        |
| $W_{c,sp}$        | Synaptic weight tuned to reproduce physiological results        |
| $W_{c,sv}$        | Synaptic weight tuned to reproduce physiological results        |

| Parameter  | Definition                                               |
|------------|----------------------------------------------------------|
| $W_{c,v}$  | Synaptic weight tuned to reproduce physiological results |
| $W_{p,sh}$ | Synaptic weight tuned to reproduce physiological results |
| $W_{p,sp}$ | Synaptic weight tuned to reproduce physiological results |
| $W_{p,sv}$ | Synaptic weight tuned to reproduce physiological results |
| $W_{p,v}$  | Synaptic weight tuned to reproduce physiological results |
| $W_{t,sh}$ | Synaptic weight tuned to reproduce physiological results |
| $W_{t,sp}$ | Synaptic weight tuned to reproduce physiological results |
| $W_{t,sv}$ | Synaptic weight tuned to reproduce physiological results |
| $W_{t,v}$  | Synaptic weight tuned to reproduce physiological results |

## S2.5. Effectors for Reflex Control

### Resistances, Unstressed Volumes and Cardiac Elastances

$$\sigma_{\theta} = \begin{cases} G_{\theta} \cdot \ln[f_{sj}(t - D_{\theta}) - f_{es,min} + 1] & f_{sj} \geq f_{es,min} \\ 0 & f_{sj} < f_{es,min} \end{cases} \quad (S28)$$

$$\tau_{\theta} \cdot \frac{d\Delta\theta}{dt} = -\Delta\theta + \sigma_{\theta} \quad (S29)$$

$$\theta(t) = \Delta\theta(t) + \theta_0 \quad (S30)$$

Where the subscript  $\theta = R_{ep}, R_{sp}, R_{rmp,n}, R_{amp,n}, V_{u,ev}, V_{u,sv}, V_{u,rmv}, V_{u,amv}, E_{max,lv}, E_{max,rv}$  denotes the generic controlled variable;  $\sigma_{\theta}$  is the output of the static characteristic.

**Table S11. Parameters of Effectors for Reflex Control: Resistances, Unstressed Volumes and Cardiac Elastances.**

| Parameter           | Definition                                                           |
|---------------------|----------------------------------------------------------------------|
| $D_{E_{max,lv}}$    | Pure latency of the mechanism                                        |
| $D_{E_{max,rv}}$    | Pure latency of the mechanism                                        |
| $D_{R_{amp}}$       | Pure latency of the mechanism                                        |
| $D_{R_{ep}}$        | Pure latency of the mechanism                                        |
| $D_{R_{rmp}}$       | Pure latency of the mechanism                                        |
| $D_{R_{sp}}$        | Pure latency of the mechanism                                        |
| $D_{V_{amv}}$       | Pure latency of the mechanism                                        |
| $D_{V_{ev}}$        | Pure latency of the mechanism                                        |
| $D_{V_{rmv}}$       | Pure latency of the mechanism                                        |
| $D_{V_{sv}}$        | Pure latency of the mechanism                                        |
| $E_{max0,lv}$       | Basal level of maximum end-systolic elastance of the left ventricle  |
| $E_{max0,rv}$       | Basal level of maximum end-systolic elastance of the right ventricle |
| $f_{es,min}$        | Threshold for sympathetic stimulation                                |
| $G_{E_{max,lv}}$    | Constant gain factor                                                 |
| $G_{E_{max,rv}}$    | Constant gain factor                                                 |
| $G_{R_{amp}}$       | Constant gain factor                                                 |
| $G_{R_{ep}}$        | Constant gain factor                                                 |
| $G_{R_{rmp}}$       | Constant gain factor                                                 |
| $G_{R_{sp}}$        | Constant gain factor                                                 |
| $G_{V_{amv}}$       | Constant gain factor                                                 |
| $G_{V_{ev}}$        | Constant gain factor                                                 |
| $G_{V_{rmv}}$       | Constant gain factor                                                 |
| $G_{V_{sv}}$        | Constant gain factor                                                 |
| $R_{amp,0}$         | Basal level of active skeletal peripheral resistance                 |
| $R_{ep,0}$          | Basal level of extra-splanchnic peripheral resistance                |
| $R_{rmp,0}$         | Basal level of resting skeletal peripheral resistance                |
| $R_{sp,0}$          | Basal level of splanchnic peripheral resistance                      |
| $\tau_{E_{max,lv}}$ | Time constant                                                        |
| $\tau_{E_{max,rv}}$ | Time constant                                                        |
| $\tau_{R_{amp}}$    | Time constant                                                        |
| $\tau_{R_{ep}}$     | Time constant                                                        |
| $\tau_{R_{rmp}}$    | Time constant                                                        |
| $\tau_{R_{sp}}$     | Time constant                                                        |
| $\tau_{V_{amv}}$    | Time constant                                                        |
| $\tau_{V_{ev}}$     | Time constant                                                        |
| $\tau_{V_{rmv}}$    | Time constant                                                        |

| Parameter       | Definition                                                      |
|-----------------|-----------------------------------------------------------------|
| $\tau_{V_{sv}}$ | Time constant                                                   |
| $V_{u,amv0}$    | Basal level of active skeletal muscle venous unstressed volume  |
| $V_{u,ev0}$     | Basal level of extra-splanchnic venous unstressed volume        |
| $V_{u,rmv0}$    | Basal level of resting skeletal muscle venous unstressed volume |
| $V_{u,sv0}$     | Basal level of splanchnic venous unstressed volume              |

Where v is spikes/s.

### Heart Period

$$\sigma_{T,s}(t) = \begin{cases} G_{T,s} \cdot \ln[f_{sh}(t - D_{T,s}) - f_{es,min} + 1] & f_{sh} \geq f_{es,min} \\ 0 & f_{sh} < f_{es,min} \end{cases} \quad (S31)$$

$$\tau_{T,s} \cdot \frac{d\Delta T_s(t)}{dt} = -\Delta T_s(t) + \sigma_{T,s}(t) \quad (S32)$$

$$\sigma_{T,v}(t) = G_{T,v} \cdot f_v(t - D_{T,v}) \quad (S33)$$

$$\tau_{T,v} \cdot \frac{d\Delta T_v(t)}{dt} = -\Delta T_v(t) + \sigma_{T,v}(t) \quad (S34)$$

$$T = \Delta T_v + \Delta T_s + T_0 \quad (S35)$$

$$HR = \frac{1}{T} \quad (S36)$$

Where  $\Delta T_v$  represents the changes in heart period induced by parasympathetic stimulation;  $\Delta T_s$  represents the changes in heart period induced by sympathetic stimulation;  $\sigma_{T,s}$  and  $\sigma_{T,v}$  are the output of the static characteristic.

**Table S12. Parameters of Effectors for Reflex Control: Heart Period.**

| Parameter    | Definition                                                      |
|--------------|-----------------------------------------------------------------|
| $D_{T,s}$    | Pure latency of the mechanism                                   |
| $D_{T,v}$    | Pure latency of the mechanism                                   |
| $f_{sh}IC$   | Initial condition for the efferent sympathetic cardiac activity |
| $f_vIC$      | Initial condition for the efferent vagal activity               |
| $G_{T,s}$    | Constant gain factor                                            |
| $G_{T,v}$    | Constant gain factor                                            |
| $T_0$        | Heart period in the absence of cardiac innervation              |
| $\tau_{T,s}$ | Time constant                                                   |
| $\tau_{T,v}$ | Time constant                                                   |

### S3. Respiratory mechanics

The equations related to the Respiratory Mechanics are presented below. The main elements include compliances (C), elastances (E), pressures (P), resistances (R), volumes (V) and flows ( $\dot{V}$ ). Different subscripts are used: AW, airway; CW, chest wall; L, lung transmural; LA, lower airway; pl, pleural; ua, upper airway.

#### S3.1. Pulmonary Mechanics

$$\dot{V}(t) = \frac{G_{AW}}{R_{rs}} \cdot ((P_{musc}(t) - P_{ao}) - E_{rs} \cdot V(t)) \quad (S37)$$

Where  $E_{rs}$  is the overall elastance;  $R_{rs}$  is the overall resistance;  $P_{musc}(t)$  is the muscle pressure signal;  $P_{ao}$  is the pressure at the airway opening;  $\dot{V}(t)$  is the respiratory airflow signal;  $V(t)$  is the respiratory volume signal.

### S4. Respiratory controller

The equations related to the Ventilation Controller and Breathing Pattern Optimizer are the presented below. The variables include pressures (P), volumes (V) and flows ( $\dot{V}$ ). A and D indicate alveolar and dead space compartment.

#### S4.1. Ventilation Controller

$$\dot{V}A = \dot{V}A_{rest} \cdot (KpCO_2 \cdot P_{amCO_2} + KcCO_2 \cdot P_{mbCO_2} + G_3 + KcMRV \cdot MRV - Kbg) \quad (S38)$$

$$G_3 = \begin{cases} KpO_2 \cdot (104 - P_{amO_2})^{4.9} & P_{amO_2} < 104 \\ 0 & P_{amO_2} \geq 104 \end{cases} \quad (S39)$$

$$\dot{V}A = \begin{cases} \dot{V}'A & \dot{V}'A \geq 0 \\ 0 & \dot{V}'A < 0 \end{cases} \quad (S40)$$

$$\dot{V}E = \dot{V}A + \dot{V}D \quad (S41)$$

$$\dot{V}D = BF \cdot \dot{V}D \quad (S42)$$

$$VD = GV_{dead} \cdot \dot{V}A + V0_{dead} \quad (S43)$$

Where  $P_{amO_2}$ ,  $P_{amCO_2}$  and  $P_{bmCO_2}$  are the mean values of  $P_{aO_2}$ ,  $P_{aCO_2}$  and  $P_{bCO_2}$  in each respiratory cycle; MRV is the metabolically related neural drive component to ventilation;  $\dot{V}_E$  is the total minute ventilation.

**Table S13. Parameters of Ventilation Controller.**

| Parameter         | Definition                                                   |
|-------------------|--------------------------------------------------------------|
| $GV_{dead}$       | Constant gain for dead space volume                          |
| $Kbg$             | Blood gas dissociation constant                              |
| $KcCO_2$          | Constant gain of $CO_2$ central chemoreceptors               |
| $KcMRV$           | Constant gain of central response to exercise (neural drive) |
| $KpCO_2$          | Constant gain of $CO_2$ peripheral chemoreceptors            |
| $KpO_2$           | Constant gain of $O_2$ peripheral chemoreceptors             |
| $V0_{dead}$       | Offset value of dead space volume                            |
| $\dot{V}A_{rest}$ | Basal value of alveolar ventilation                          |

#### S4.2. Breathing Pattern Optimizer

$$J = \dot{W}_T \quad (S44)$$

$$\dot{W}_T = \dot{W}_I + \lambda_2 \cdot \dot{W}_E \quad (S45)$$

$$\dot{W}_I = \frac{1}{(t_1 + t_2)} \int_0^{t_1} \left[ \frac{P_{musc}(t)}{\xi_1^n \xi_2^n} + \lambda_1 \cdot \dot{V}(t)^2 \right] dt \quad (S46)$$

$$\dot{W}_E = \frac{1}{(t_1 + t_2)} \int_{t_1}^{t_1+t_2} \dot{V}(t)^2 dt \quad (S47)$$

$$\xi_1 = 1 - P_{musc}(t)/P_{max} \quad (S48)$$

$$\xi_2 = 1 - \dot{P}_{musc}(t)/\dot{P}_{max} \quad (S49)$$

$$Nd = [a_0, a_1, a_2, \tau, t_1, t_2] \quad (S50)$$

$$TI = t_1 \quad (S51)$$

$$BF = 1/(t_1 + t_2) \quad (S52)$$

Where  $J$  is the cost function that must be minimized and reflects the mechanical costs of breathing;  $TI$  is the inspiratory time;  $BF$  is the Breath frequency;  $\dot{W}_T$  represent the total mechanical work;  $\dot{W}_I$  is mechanical work of the inspiratory phase;  $\dot{W}_E$  is mechanical work of the expiratory phase;  $\xi_1$  and  $\xi_2$  are efficiency factors;  $Nd$  is the neural drive signal, which defines the breathing pattern subject.

**Table S14. Parameters of Breathing Pattern Optimizer.**

| Parameter       | Definition                               |
|-----------------|------------------------------------------|
| $\lambda_1$     | Weighting factor                         |
| $\lambda_2$     | Weighting factor                         |
| $n$             | Power index of efficiency factor         |
| $P_{max}$       | Maximum inspiratory pressure             |
| $\dot{P}_{max}$ | maximum pressure rate during inspiration |

#### S5. Gas exchange system

The equations related to the Gas exchange system are presented below. The variables include concentrations (C), pressures (P), fractions (F), volumes (V) and flows ( $\dot{V}$ ). Different subscripts are used: gas, the specific gas ( $O_2$  or  $CO_2$ ); dead, dead space; a, arterial; A, alveolar; v, venous.

##### S5.1. Gas Exchange and Mixing

$$V_{gas} \cdot \frac{dP_{a_{gas}}}{dt} = \begin{cases} 863 \cdot (Q_{pp})(C_{v_{gas}} - C_{a_{gas}}) + \dot{V} \cdot (P_{d(5)gas} - P_{A_{gas}}) & \dot{V}(t) \geq 0 \\ 863 \cdot (Q_{pp})(C_{v_{gas}} - C_{a_{gas}}) & \dot{V}(t) < 0 \end{cases} \quad (S53)$$

$$V_{gas} = V(t) + VL_{gas} \quad (S54)$$

$$(T1 \cdot T2) \cdot \frac{d^2 P_{a_{gas}}}{dt^2} = P_{a_{gas}}(t - Ta) - (T1 + T2) \cdot \frac{dP_{a_{gas}}}{dt} - P_{a_{gas}} \quad (S55)$$

$$Ta = \frac{LCTV}{Q_{la}} \quad (S56)$$

$$C_{aCO_2} = (C_2 \cdot Z) \cdot \frac{F_{CO_2}^{1/a_2}}{1 + F_{CO_2}^{1/a_2}} \quad (S57)$$

$$F_{CO_2} = \frac{PACO_2(1 + \beta_2 PAO_2)}{K_2(1 + \alpha_2 PAO_2)} \quad (S58)$$

$$C_{aO_2} = (C_1 \cdot Z) \cdot \frac{F_{O_2}^{1/a_1}}{1 + F_{O_2}^{1/a_1}} \quad (S59)$$



$$F_{CO_2} = \frac{PAO_2(1 + \beta_1 PACO_2)}{K_1(1 + \alpha_1 PACO_2)} \quad (S60)$$

Where  $Q_{1a}$  is the blood flow in the left atrium;  $P_{d(5)gas}$  is the gas pressure in the fifth dead space compartment.

**Table S15. Parameters of the Gas Exchange and Mixing.**

| Parameter        | Definition                                                                                        |
|------------------|---------------------------------------------------------------------------------------------------|
| $a_1$            | Parameter associated with the Bohr and Haldane effects regarding the $O_2$ dissociation in blood  |
| $a_2$            | Parameter associated with the Bohr and Haldane effects regarding the $CO_2$ dissociation in blood |
| $\alpha_1$       | Parameter associated with the Bohr and Haldane effects regarding the $O_2$ dissociation in blood  |
| $\alpha_2$       | Parameter associated with the Bohr and Haldane effects regarding the $CO_2$ dissociation in blood |
| $\beta_1$        | Parameter associated with the Bohr and Haldane effects regarding the $O_2$ dissociation in blood  |
| $\beta_2$        | Parameter associated with the Bohr and Haldane effects regarding the $CO_2$ dissociation in blood |
| $C_1$            | Maximum concentration of hemoglobin-bound oxygen                                                  |
| $C_2$            | Maximum carbon dioxide concentration                                                              |
| $P_{d(5)CO_2IC}$ | Initial condition for 5 <sup>th</sup> $CO_2$ dead space                                           |
| $P_{d(5)O_2IC}$  | Initial condition for 5 <sup>th</sup> $O_2$ dead space                                            |
| $K_1$            | Parameter in $O_2$ dissociation equation                                                          |
| $K_2$            | Parameter in $CO_2$ dissociation equation                                                         |
| $LCTV$           | Lung to chemoreceptor transportation vascular volume constant                                     |
| $T1$             | Time constant for cardiovascular mixing                                                           |
| $T2$             | Time constant for cardiovascular mixing                                                           |
| $VL_{CO_2}$      | Lungs storage volume for $CO_2$                                                                   |
| $VL_{O_2}$       | Lungs storage volume for $O_2$                                                                    |
| $Z$              | Molar conversion factor from mmol/l to l/l                                                        |

## S5.2. Gas transport

### Brain Compartment

$$SbCO_2 \cdot \frac{dPvbCO_2}{dt} = MRBCO_2 + Q_{bp} \cdot SCO_2(PaCO_2 - PvbCO_2) - h \quad (S61)$$

$$KCSFCO_2 \cdot \frac{dPCSFCO_2}{dt} = PvbCO_2 - PCSFCO_2 \quad (S62)$$

$$PbCO_2 = PvbCO_2 + (PCSFCO_2 - PvbCO_2) \cdot \exp^{-dc(Q_{bp} \cdot KCCO_2)^{0.5}} \quad (S63)$$

Where  $PvbCO_2$  is the brain venous blood pressure of  $CO_2$ ;  $PCSFCO_2$  is the partial pressure of  $CO_2$  in the cerebrospinal fluid;  $PbCO_2$  is the brain carbon dioxide partial pressure (partial pressure of  $CO_2$  at the site of central receptors).

**Table S16. Parameters of the Gas transport: Brain Compartment.**

| Parameter  | Definition                                                  |
|------------|-------------------------------------------------------------|
| $dc$       | Depth of central receptor below surface of the medulla      |
| $h$        | Cerebral blood flow constant                                |
| $KCCO_2$   | $CO_2$ central receptor constant                            |
| $KCSFCO_2$ | $CO_2$ diffusion time constant of cerebrospinal fluid       |
| $MRBCO_2$  | Metabolic production rate for $CO_2$ in the brain tissue    |
| $MRBO_2$   | Metabolic production rate for $O_2$ in the brain tissue     |
| $PbCO_2IC$ | Initial condition for brain carbon dioxide partial pressure |
| $SbCO_2$   | Dissociation slope for $CO_2$ in the brain tissue           |
| $SCO_2$    | Dissociation slope for $CO_2$ in the blood                  |

STPD is standard temperature and pressure, dry

### Body Tissues Compartment

$$Q_T = Q_{pp} - Q_{bp} \quad (S64)$$

$$\tau MR \cdot \frac{dMRT_{gas}}{dt} = MR_{gas} - MRT_{gas} \quad (S65)$$

$$VTCO_2 \cdot \frac{dCvCO_2}{dt} = MRTCO_2 + Q_T(CaCO_2 - CvCO_2) \quad (S66)$$

$$VTO_2 \cdot \frac{dCvO_2}{dt} = -MRTO_2 + Q_T(CaO_2 - CvO_2) \quad (S67)$$

Where  $Q_T$  is the blood flow in the tissues;  $CvCO_2$  and  $CvO_2$  are the mixed venous  $CO_2$  and  $O_2$  concentrations;  $MRT_{gas}$  is the metabolic tissue rate for the specific gas;  $MR_{gas}$  is the metabolic rate for the specific gas.

**Table S17. Parameters of the Gas transport: Body Tissues Compartment.**

| Parameter   | Definition                            |
|-------------|---------------------------------------|
| $\tau MR$   | Metabolic rate time constant          |
| $VT_{CO_2}$ | Body tissue storage volume for $CO_2$ |
| $VT_{O_2}$  | Body tissue storage volume for $O_2$  |

**S5.3. Metabolism Dynamic**

$$M'RR = \frac{(MRBCO_2 + MRBO_2 + MRTCO_2 + MRTO_2)}{(MRBCO_2 + MRBO_2 + MRTCO_2 basal + MRTO_2 basal)} \quad (S68)$$

$$MRR = \begin{cases} M'RR & M'RR \geq 1 \\ 1 & M'RR < 1 \end{cases} \quad (S69)$$

$$\tau MRV \cdot \frac{dM'RV}{dt} = (MRR - 1) - M'RV \quad (S70)$$

$$MRV = \begin{cases} M'RV & M'RV \geq 0 \text{ \& } MRR > 1 \\ 0 & M'RV < 0 \mid MRR \leq 1 \end{cases} \quad (S71)$$

Where MRR is the metabolic rate ratio and MRV is the metabolically related neural drive component to ventilation.

**Table S18. Parameters of the Gas transport: Metabolism Dynamic.**

| Parameter       | Definition                                 |
|-----------------|--------------------------------------------|
| $MRTCO_2 basal$ | Basal metabolic production rate for $CO_2$ |
| $MRTO_2 basal$  | Basal metabolic consumption rate for $O_2$ |
| $\tau MRV$      | Metabolic rate time constant               |

**REFERENCES**

- [1] C.A. Sarmiento, A.M. Hernandez, L.Y. Serna Higueta, M.Á. Mañanas, An integrated mathematical model of the cardiovascular and respiratory response to exercise: Model-building and comparison with reported models, Am. J. Physiol. Circ. Physiol. (2021) ajpheart.00074.2020. <https://doi.org/10.1152/ajpheart.00074.2020>.
